# Supplementary material for: Evaluation of kasugamycin as a chiral selector in capillary electrophoresis
Source: Royal Society of Chemistry journal article supplement (doi:10.1039/d2an01949c), 2023-01-01
Supplement: d2an01949c1.pdf [file d2an01949c1.pdf]

# Supporting Information for

## Evaluation of kasugamycin as a chiral selector in capillary electrophoresis

**Table S1** Physical and chemical properties of KAS.

| Item                     | Description                                                                                                                          |
|--------------------------|--------------------------------------------------------------------------------------------------------------------------------------|
| Synonyms                 | Kasumin; Kasurabcide                                                                                                                 |
| Classification           | Aminoglycoside antibiotic; Agricultural antibiotic                                                                                   |
| Appearance               | White to light yellow powder                                                                                                         |
| Chemical formula         | $C_{14}H_{25}N_3O_9$                                                                                                                 |
| Relative molecular mass  | 379.363                                                                                                                              |
| Melting point            | 236 °C                                                                                                                               |
| LogP                     | -2.06                                                                                                                                |
| Solubility               | Insoluble in several organic solvents (methanol, ethanol, benzene, etc ); Easily soluble in water (about 1g/8mL at room temperature) |
| pKa                      | 3.23                                                                                                                                 |
| Number of chiral centers | 10                                                                                                                                   |

**Table S2** Comparable properties of some typical antibiotics chiral selectors.

| Kind             | Representative        | Consumption | Water solubility | Ultraviolet absorption | Price     | Stereoselectivity |
|------------------|-----------------------|-------------|------------------|------------------------|-----------|-------------------|
| Glycopeptides    | Vancomycin            | Small       | Moderate         | Strong                 | Expensive | Strong            |
| Ansamycins       | Rifampicin            | Moderate    | Poor             | Strong                 | Moderate  | Moderate          |
| Macrolides       | Clarithromycin        | Large       | Poor             | Weak                   | Moderate  | Moderate          |
| $\beta$ -lactams | Penicillin G          | Small       | Moderate         | Strong                 | Cheap     | Moderate          |
| Tetracyclines    | Doxycycline           | Moderate    | Moderate         | Strong                 | Expensive | Moderate          |
| Lincosamides     | Clindamycin phosphate | Moderate    | Good             | Weak                   | Expensive | Strong            |
| Aminoglycosides  | Kanamycin             | Moderate    | Moderate         | Weak                   | Cheap     | Weak              |
|                  | KAS (this work)       | Moderate    | Good             | Weak                   | Moderate  | Moderate          |

**Table S3** Effect of KAS concentration on chiral separations.

| Rs<br>Analytes | KAS concentration (mM) |      |      |      |      |
|----------------|------------------------|------|------|------|------|
|                | 40                     | 50   | 60   | 70   | 80   |
| EPH(PSE)       | 5.40                   | 6.57 | 8.64 | 8.32 | 7.75 |
| QIN(QID)       | 0.55                   | 1.21 | 1.52 | 1.50 | 1.44 |
| CIN(CID)       | 0.55                   | 1.18 | 1.51 | 1.47 | 1.43 |

Conditions: capillary temperature, 25 °C; separation voltage, 8 kV; BGE, 40 mM borax buffer containing 20% methanol (v/v) for QIN(QID), CIN(CID) or none of organic modifiers for EPH(PSE) and 40-80 mM KAS; buffer pH, 8.0 for QIN(QID) and CIN(CID) or 8.2 for EPH(PSE).

**Table S4** Effect of separation voltage on chiral separations.

| Rs<br>Analytes | Separation voltage (kV) |      |      |      |
|----------------|-------------------------|------|------|------|
|                | 6                       | 8    | 10   | 12   |
| EPH(PSE)       | 8.06                    | 8.64 | 7.11 | 5.62 |
| QIN(QID)       | 1.45                    | 1.52 | 1.16 | 0.80 |
| CIN(CID)       | 1.43                    | 1.51 | 1.10 | 0.79 |

Conditions: capillary temperature, 25 °C; separation voltage, 6-12 kV; BGE, 40 mM borax buffer containing 20% methanol (v/v) for QIN(QID), CIN(CID) or none of organic modifiers for EPH(PSE) and 60 mM KAS; buffer pH, 8.0 for QIN(QID) and CIN(CID) or 8.2 for EPH(PSE).

**Table S5** Chiral separation results with KAS as a chiral selector.

| Analytes  | Migration time       |                      | Number of theoretical plates |                | Resolution | Selectivity factor |
|-----------|----------------------|----------------------|------------------------------|----------------|------------|--------------------|
|           | t <sub>1</sub> (min) | t <sub>2</sub> (min) | N <sub>1</sub>               | N <sub>2</sub> | Rs         | $\alpha$           |
| EPH (PSE) | 7.238                | 8.680                | 41925                        | 32163          | 8.64       | 1.200              |
| QIN (QID) | 17.745               | 18.172               | 69746                        | 57718          | 1.52       | 1.024              |
| CIN (CID) | 17.468               | 17.872               | 74348                        | 51224          | 1.51       | 1.023              |
| PRO       | 9.521                | 9.869                | 11793                        | 22909          | 1.04       | 1.037              |
| AML       | 11.823               | /                    | /                            | /              | <0.5       | /                  |
| OFL       | 25.275               | /                    | /                            | /              | <0.5       | /                  |

Conditions: capillary temperature, 25 °C; separation voltage, +8 kV; BGE, 40 mM borax buffer containing 20% methanol (v/v, 0% for PRO, AML, EPH and PSE) and 60 mM KAS; buffer pH, 8.0 (8.2 for EPH and PSE).

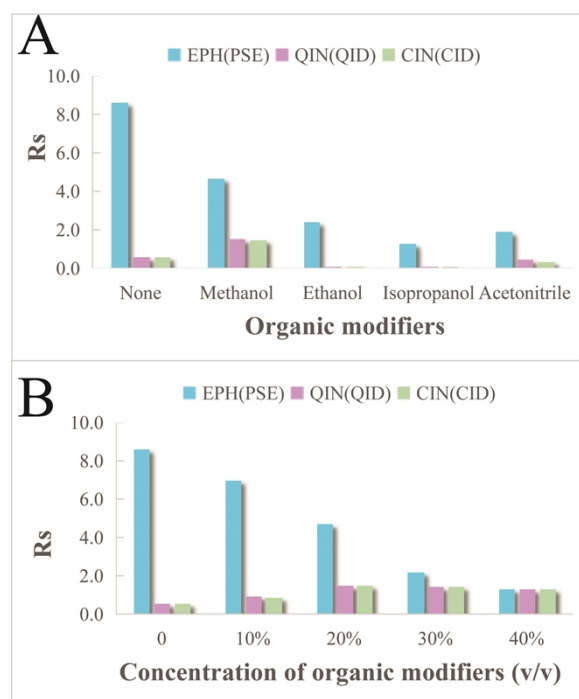

**Fig.S1** (A) Chiral separations with different organic solvents as additives. Conditions: capillary temperature, 25 °C; voltage, 8 kV; BGE, 40 mM borax buffer containing 20% organic modifiers (v/v) and 60 mM KAS; buffer pH, 8.0 for QIN(QID) and CIN(CID) or 8.2 for EPH(PSE). (B) Effect of methanol concentration on enantioseparation. Conditions: capillary temperature, 25 °C; voltage, 8 kV; BGE, 40 mM borax buffer containing 0-40% methanol (v/v) and 60 mM KAS; buffer pH, 8.0 for QIN(QID) and CIN(CID) or 8.2 for EPH(PSE).

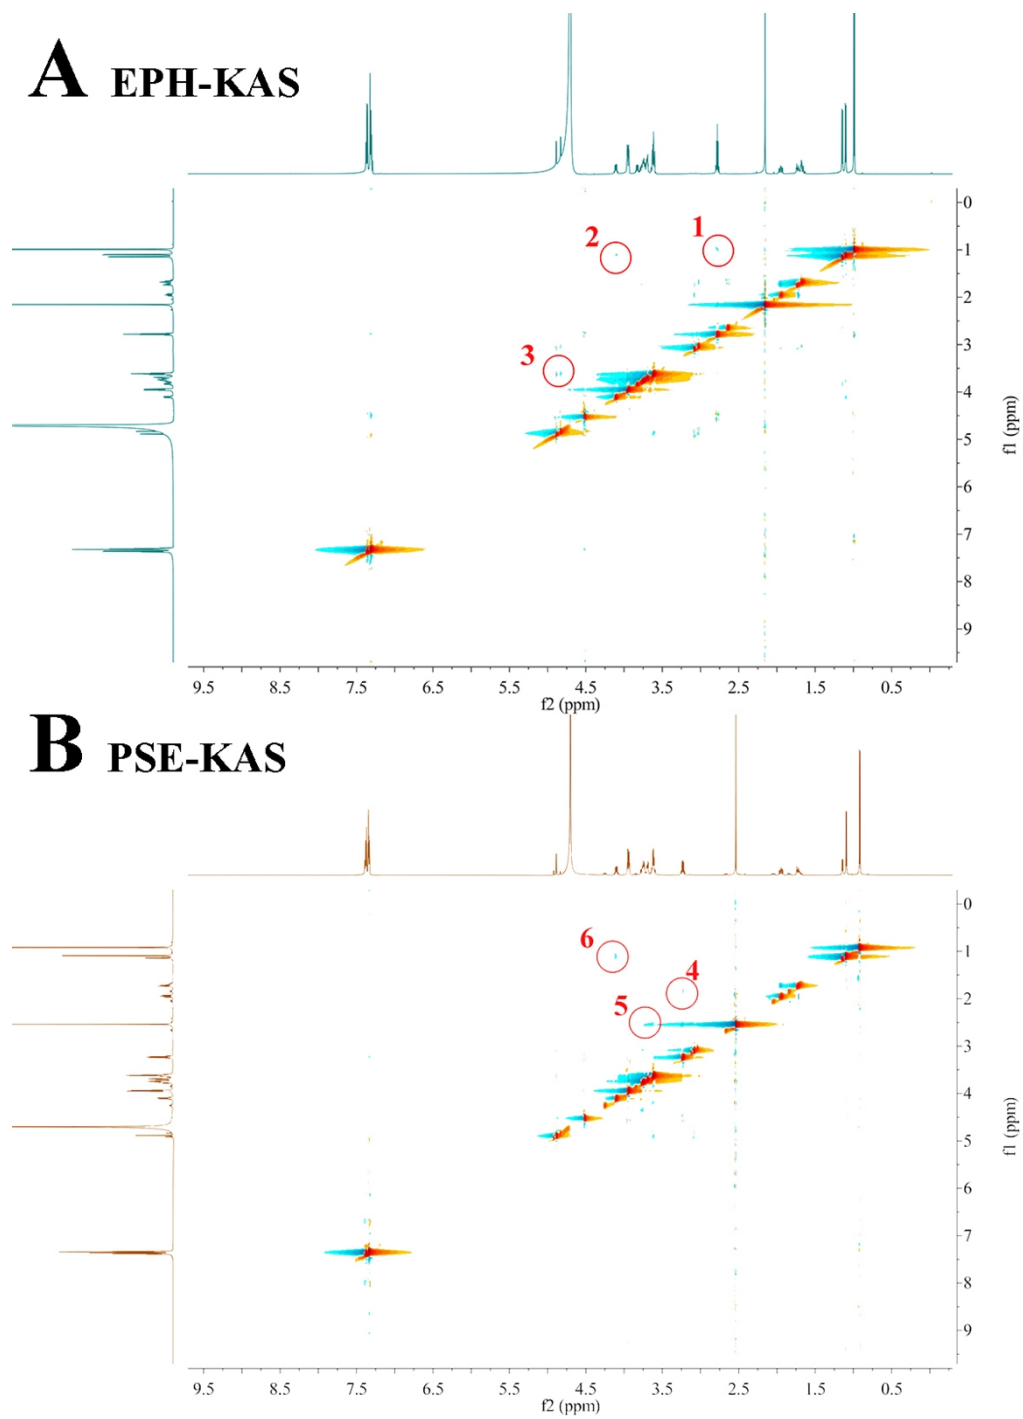

**Fig.S2** 2D ROESY NMR spectra of (A) EPH and KAS (1:1); (B) PSE and KAS (1:1) in D<sub>2</sub>O at pH\* 8.2.

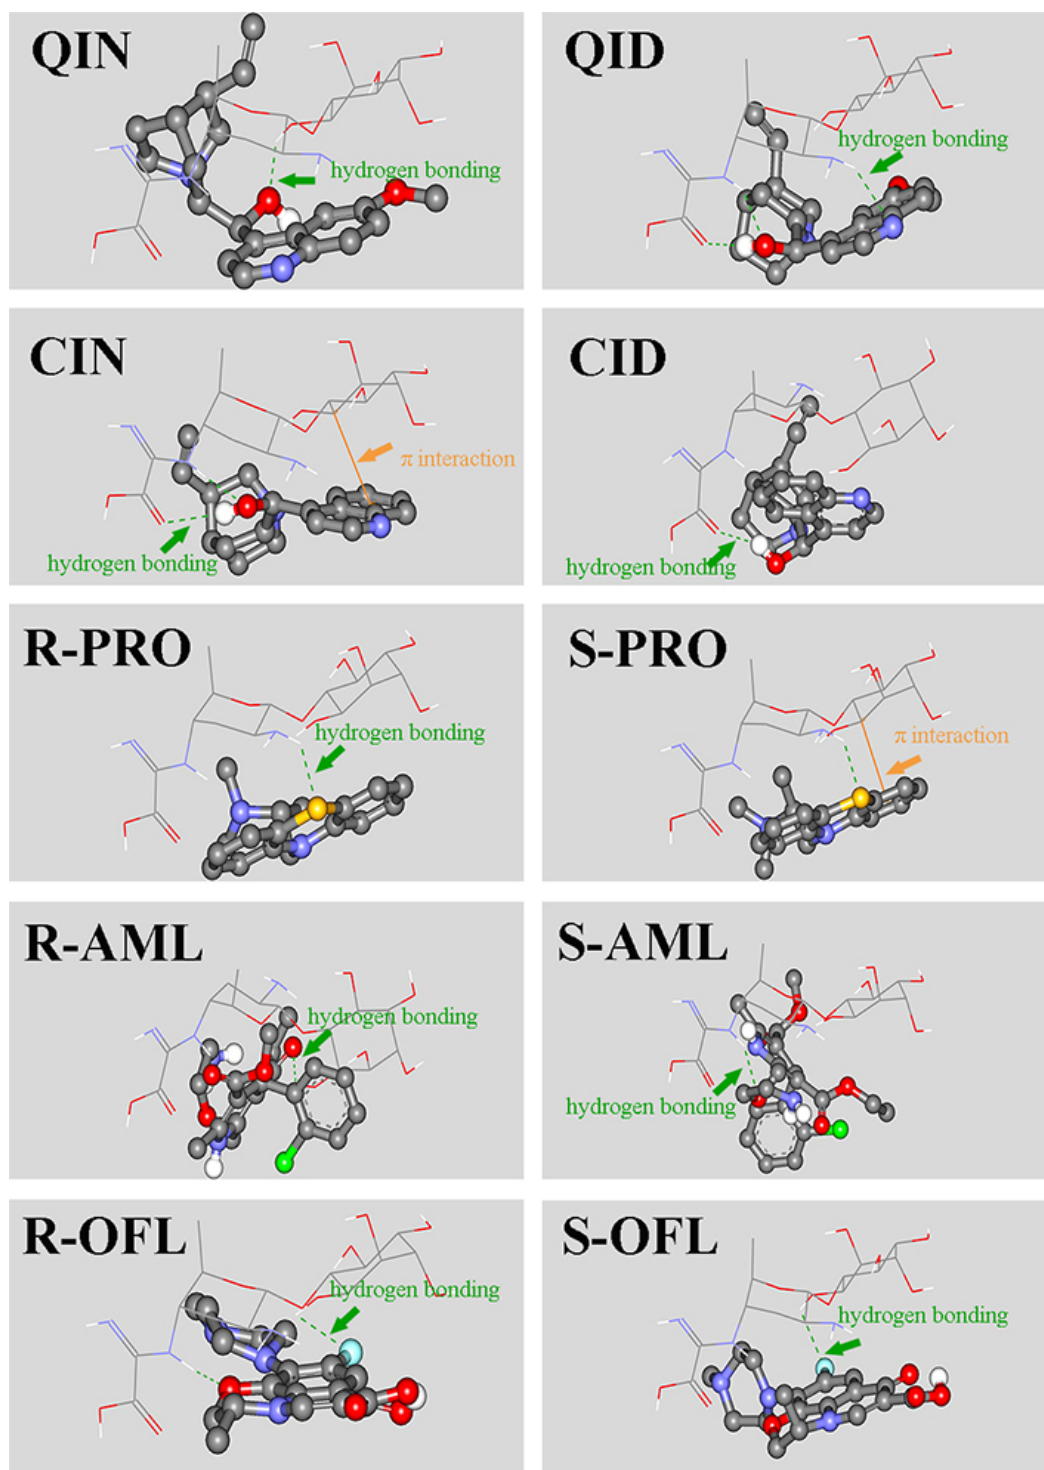

**Fig.S3** Molecular modeling conformations of other model drugs in KAS separation system. The hydrogen bonding is indicated by green dotted line, the  $\pi$  interaction is indicated by orange solid line. C grey, H white, O red, N blue, S yellow, Cl green, F light blue.
